# Supplementary material
Source: Research Square preprint supplement (doi:10.21203/rs.3.rs-9924478/v1)
Supplement: Supplementary file 1 [file b6019bbe3afd67b73132d62a.pdf]

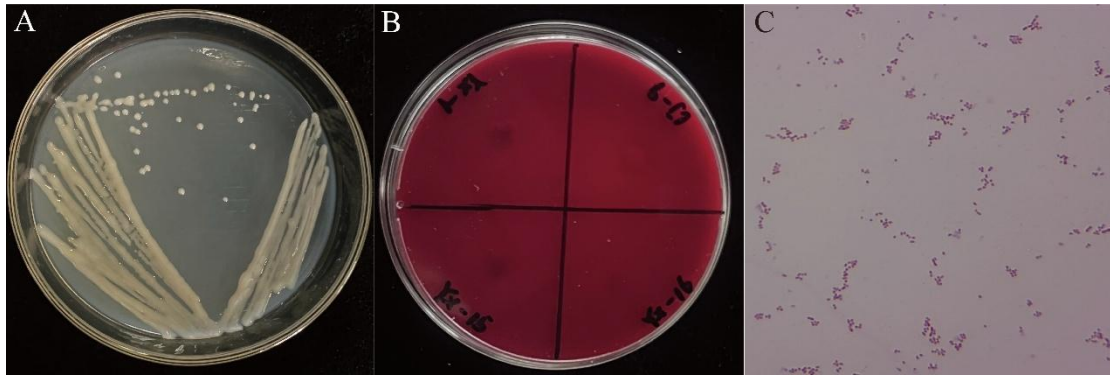

Figure S1. Phenotypic characteristics of strain YX16 A. Colony morphology B. Hemolytic ability C. Gram staining

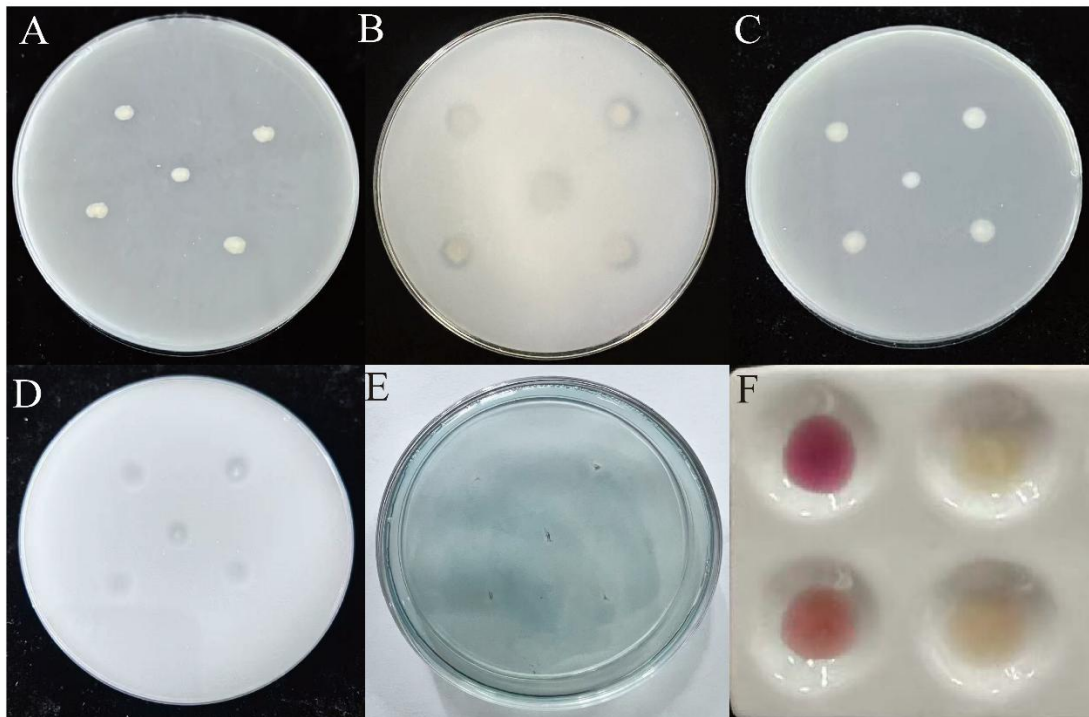

Figure S2. The growth-promoting ability of strain YX16

(A): Organic phosphorus solubilization; (B): Inorganic phosphorus solubilization; ©: Potassium solubilization; (D): Nitrogen fixation; (E): Siderophore production; (F): IAA production (Top left: positive control, top right: negative control, bottom left: strain YX16 positive treatment, bottom right: strain YX16 negative treatment)

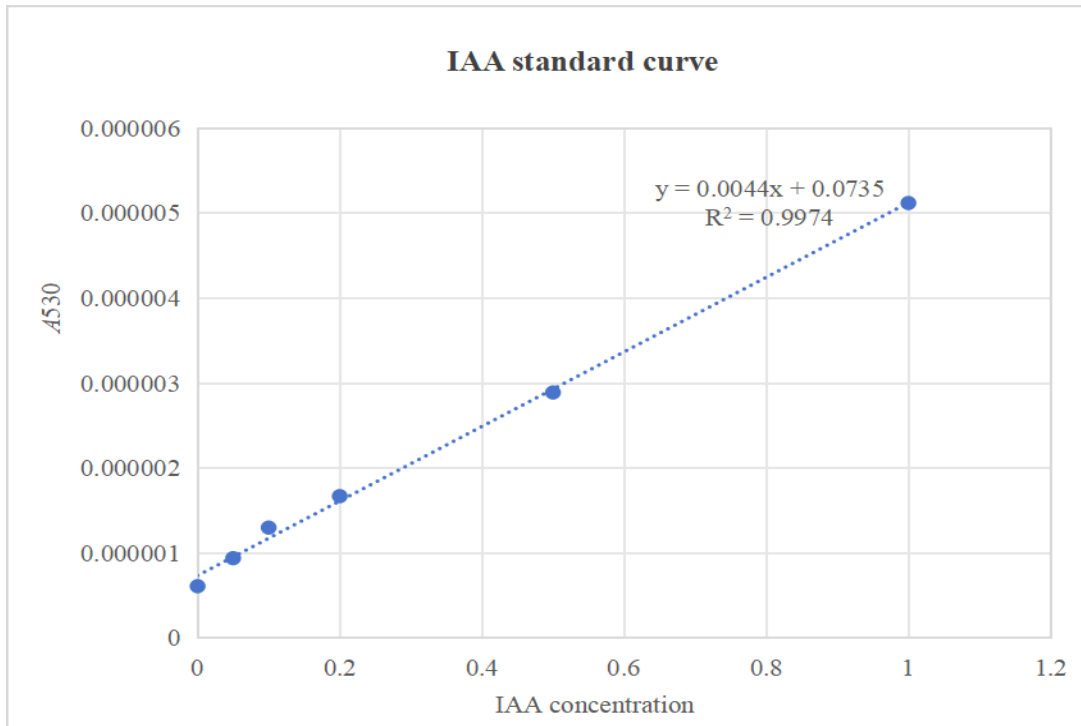

Figure S3. IAA Standard Curve
